# Supplementary material for: Two 3D metal–organic frameworks with different topologies, thermal stabilities and magnetic properties
Source: Royal Society of Chemistry journal article supplement (doi:10.1039/c2ce25442e), 2012-01-01
Supplement: c2ce25442e.pdf [file c2ce25442e.pdf]

## Two 3D metal-organic frameworks with different topologies, thermal stabilities and magnetic properties

Ting Gao,<sup>a</sup> Xiao-Zhu Wang,<sup>a</sup> Hao-Xue Gu,<sup>a</sup> Yan Xu,<sup>a</sup> Xuan Shen,<sup>a</sup> Dun-Ru Zhu<sup>\*a,b</sup>

<sup>a</sup>State Key Laboratory of Materials-oriented Chemical Engineering, College of Chemistry and Chemical Engineering, Nanjing University of Technology, Nanjing 210009, P. R. China, <sup>b</sup>State Key Laboratory of Coordination Chemistry, Nanjing University, Nanjing 210093, P. R. China

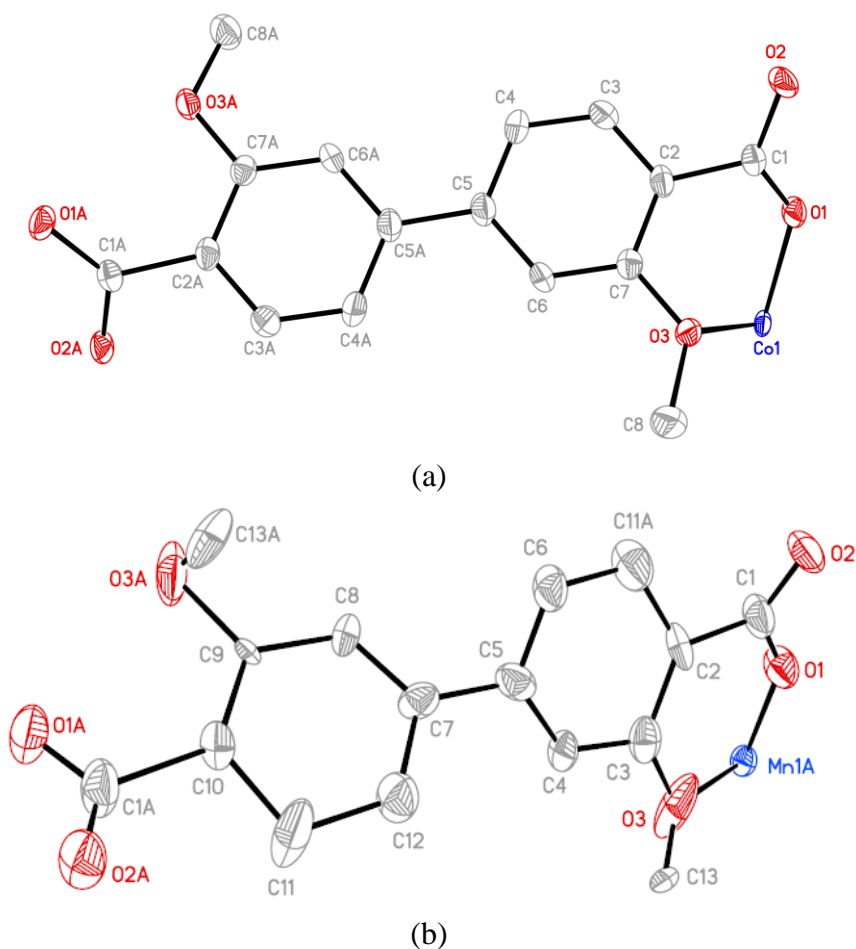

**Fig. S1** ORTEP drawing (at 50% probability) of the asymmetric unit for MOFs **1** (a) and **2** (b). Hydrogen atoms are omitted for clarity.

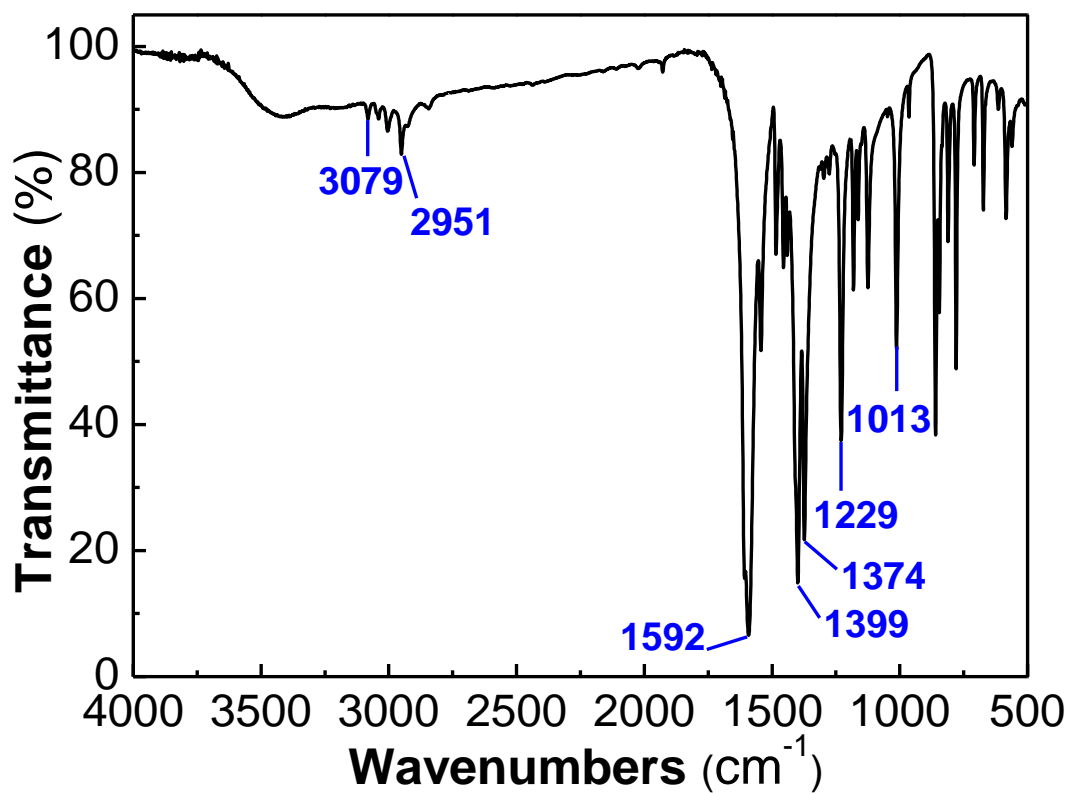

(a)

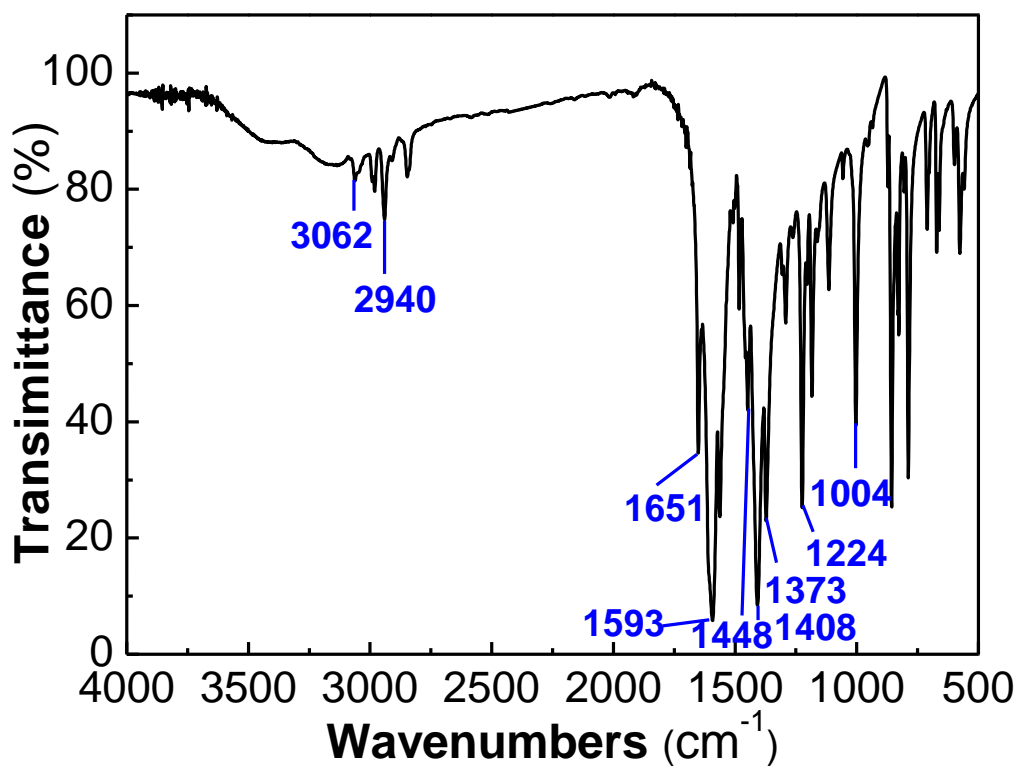

(b)

**Fig. S2** FT-IR of MOFs 1 (a) and 2 (b).

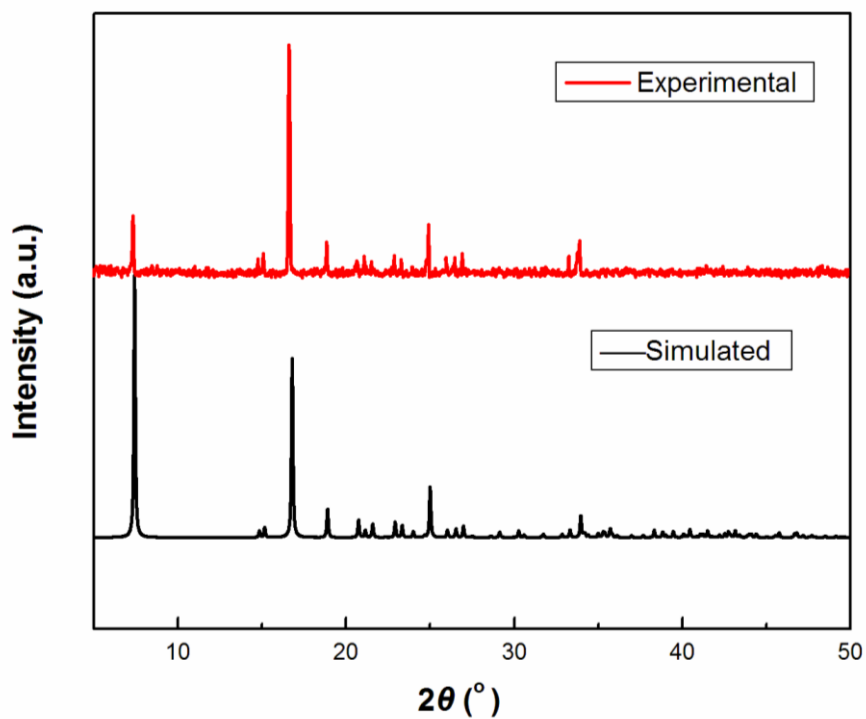

**Fig. S3** Experimental and simulated P-XRD patterns of MOF 1

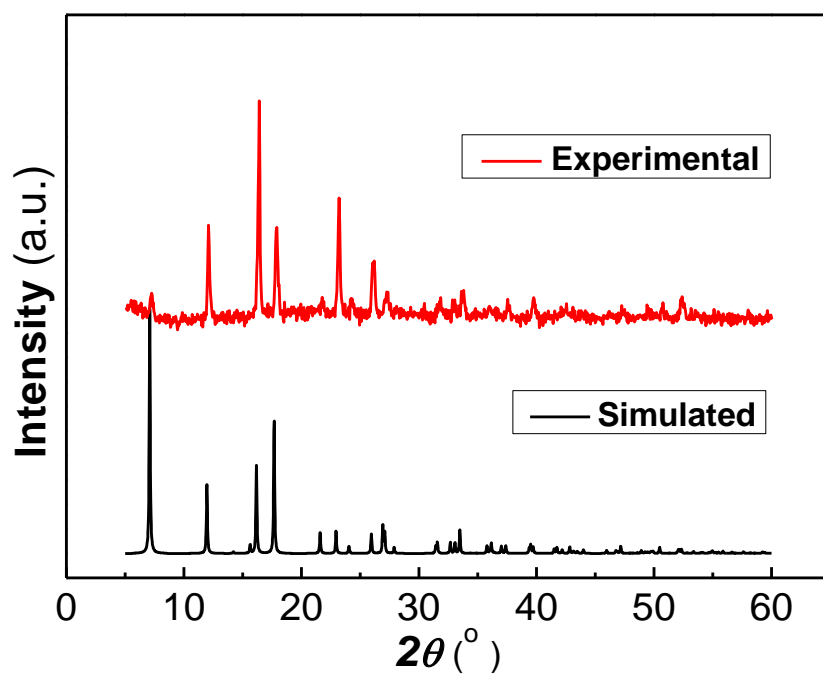

**Fig. S4** Experimental and simulated P-XRD patterns of MOF 2.
